# Supplementary material
Source: PubMed Central journal article supplement (PMC3795927)

# Supplementary Figure 1

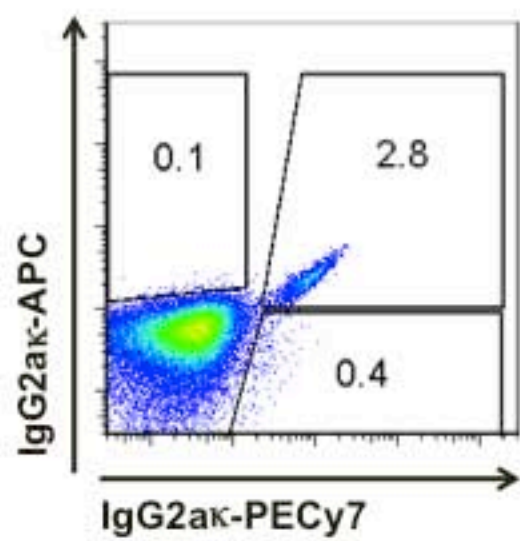

## Supplementary Figure 2

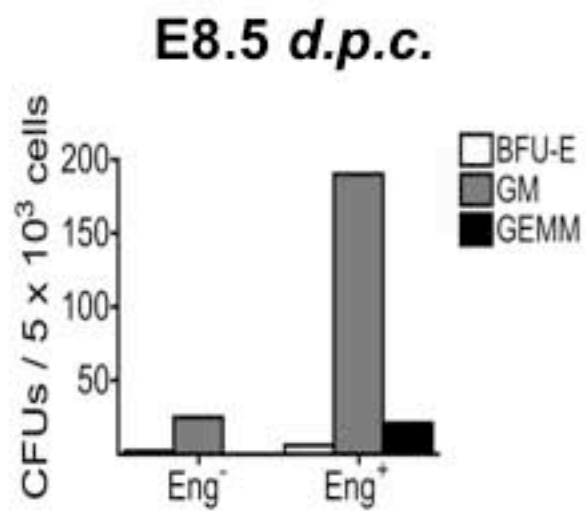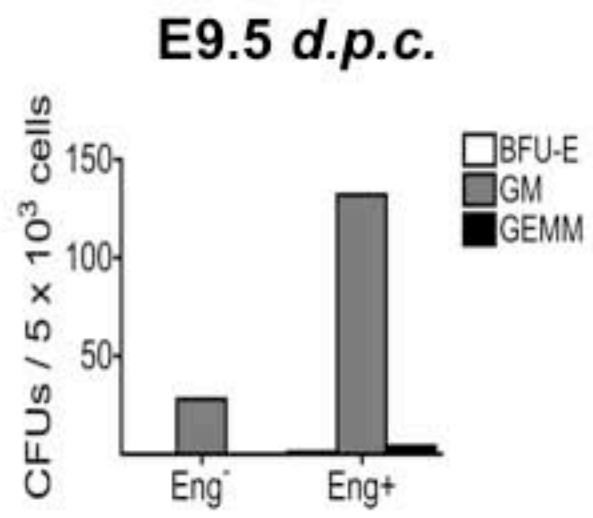

# Supplementary Figure 3

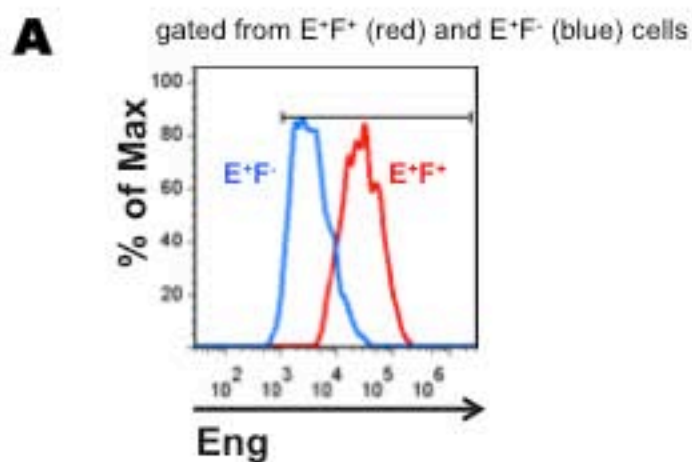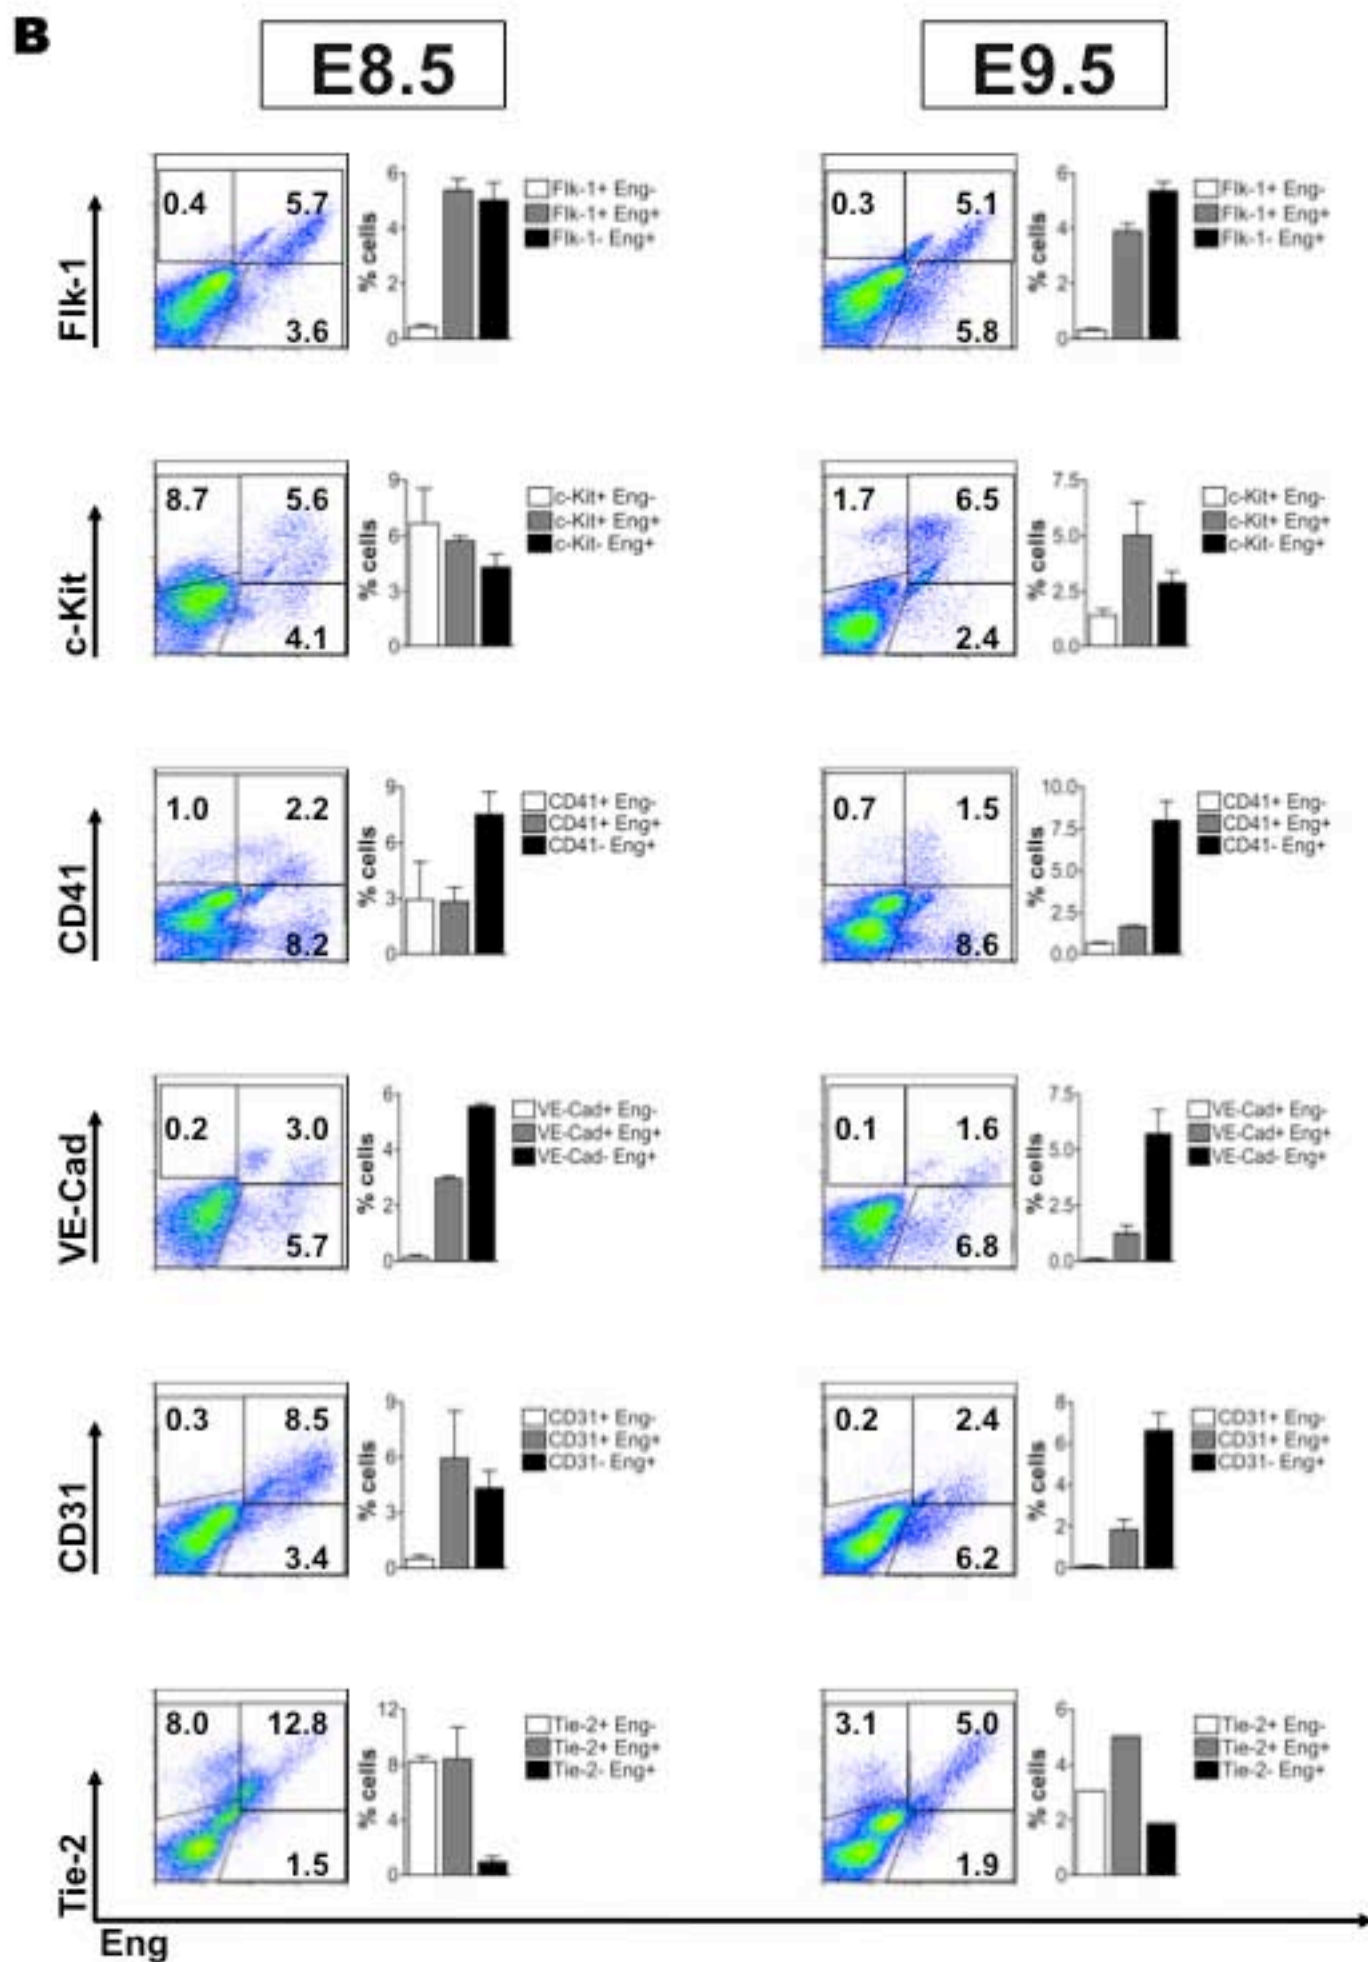

Supplementary Figure 4

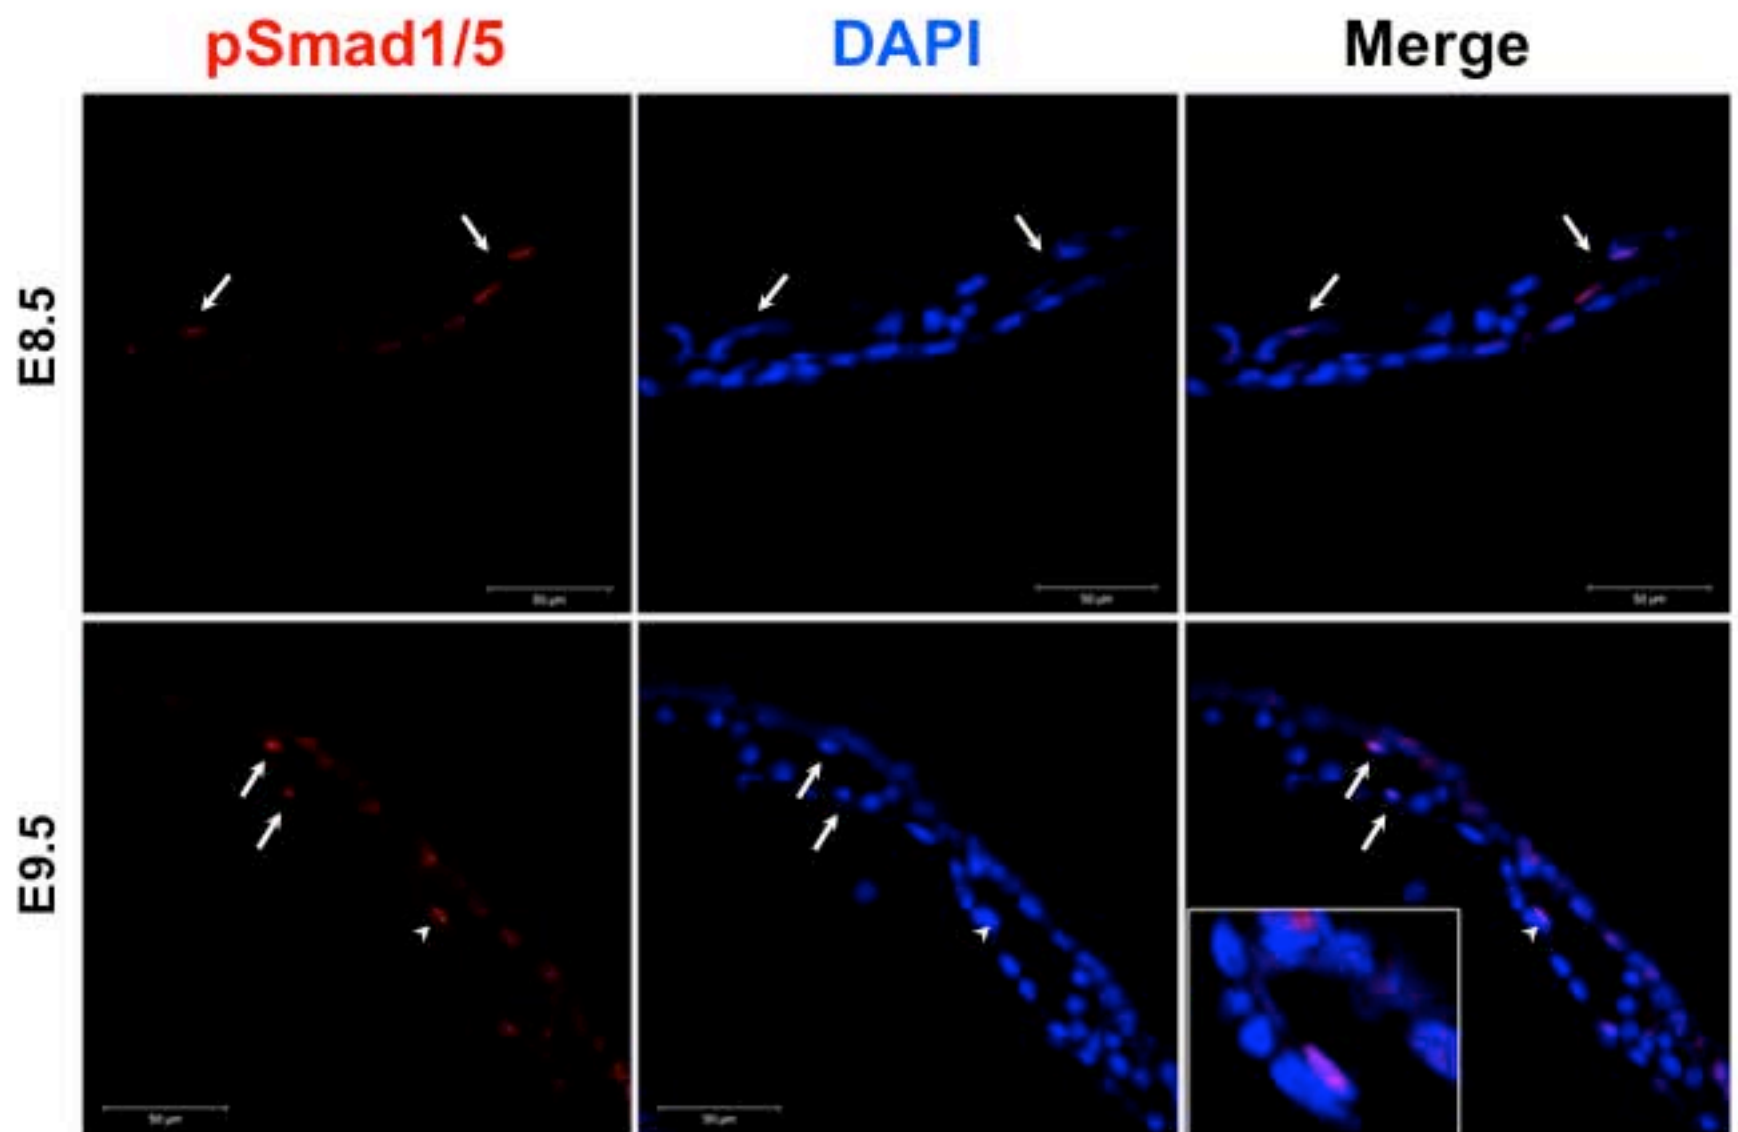

Supplement: NIHMS502956-supplement-Supp_Fig_S1-S4.pdf [file NIHMS502956-supplement-Supp_Fig_S1-S4.pdf]
